# Supplementary material for: Barriers to cervical cancer prevention and triage strategies: a study of knowledge, attitudes, and p16/Ki-67 dual-staining utility among high-risk women in Tuoli and Fuyun counties, Xinjiang
Source: PeerJ. 2025 Oct 2;13:e20100. doi: 10.7717/peerj.20100 (PMC12497396; doi:10.7717/peerj.20100)
Supplement: Supplemental Information 45 — Each Excel sheet is introduced in the Data-Introducing document. [file peerj-13-20100-s045.xlsx]

## Sheet: Table 1,2,3and Fig 2
Marital	Educational	Employment	incomes	Awareness	Screening
1	2	3	2	1	1
1	2	2	2	1	1
1	2	4	1	1	1
1	2	1	2	0	1
1	2	2	3	1	1
1	2	4	3	1	1
1	1	2	3	1	1
1	2	3	3	1	1
1	3	3	1	1	1
2	2	2	1	1	1
1	3	2	4	1	0
1	2	3		1	1
1	3	3	4	1	1
1	2	4	1	1	1
1	1	2	2	1	1
1	2	2	3	1	1
1	3	2	4	1	1
2	3	1	2	1	1
1	2	2	4	1	1
1	2	4	2	1	1
1	2	4	2	1	1
1	3	2	2	1	1
1	3	3	2	1	1
1	3	4	3	1	1
1	3	3	4	1	1
1	2	1	4	1	1
2	2	2	2	1	1
1	3	2	4	1	1
1	1	4	2	0	1
2	3	2	4	1	1
1	1	4	4	0	0
1	3	3	4	1	1
1	2	2	2	1	1
1	2	2	4	1	1
1	2	2	4	1	1
2	3	2	3	1	1
1	3	2	4	1	1
2	1	2	2	1	0
1	3	4	2	1	1
2	3	3	2	1	1
1	1	4	2	1	1
1	2	2	2	0	0
1	3	1	1	1	0
1	1	4	1	1	1
1	2	4	1	0	0
1	2	2	3	1	1
1	1	1	1	0	0
1	3	4	3	1	1
1	3	4	1	1	1
1	2	2	3	1	1
1	2	2	4	1	1
1	3	2	4	1	1
1	2	4	1	1	0
1	2	2	3	1	1
1	3	4	3	1	1
1	2	4	2	1	1
1	2	4	1	1	1
1	2	4	1	1	1
1	3	3	3	1	1
1	3	3	3	1	1
2	3	3	4	1	0
2	2	2	2	1	1
1	3	4	3	1	1
1	2	2	3	1	1
2	3	3	2	1	1
1	3	1	4	1	1
1	3	4	2	1	1
1	1	4	2	0	0
1	2	2	3	1	1
1	2	2	3	1	1
1	1	2	3	1	1
1	2	2	3	0	1
1	3	3	4	1	1
1	2	4	1	1	1
1	2	4	1	1	0
1	3	4	2	0	1
1	1	4	2	0	1
1	1	4	2	1	1
1	2	4	2	1	1
1	2	4	2	1	1
1	2	4	2	1	1
1	3	2	2	1	1
1	2	4	2	1	0
1	3	1	3	1	1
1	2	4	2	1	1
1	1	1	1	0	0
1	2	4	1	0	1
1	3	4	3	1	1
1	3	2	2	1	0
1	3	4	2	1	0
1	3	4	1	1	0
1	3	4	3	1	1
1	2	4	3	0	0
1	2	4	3	1	1
1	2	4	2	0	1
1	2	4	3	1	0
1	2	4	3	1	0
1	2	4	2	1	0
1	2	4	3	1	1
1	3	4	2	1	0
1	2	4	4	1	0
1	2	4	2	1	1
1	1	1	2	0	0
1	2	4	2	1	0
1	2	4	2	1	0
1	2	3	4	0	0
1	2	4	3	0	0
1	2	4	2	0	0
1	2	4	2	1	1
1	2	1	2	0	0
1	3	4	1	1	0
1	2	4	2	1	1
1	2	4	1	1	0
1	2	4	4	0	0
1	2	3	4	1	0
1	2	4	2	1	1
1	2	1	2	1	1
1	2	4	2	1	1
1	3	4	3	1	1
1	3	4	3	1	0
1	2	4	1	1	1
1	2	4	2	1	1
1	2	4	1	0	0
1	2	1	2	0	1
1	2	4	3	1	1
1	2	4	2	0	1
1	2	2	3	1	1
1	3	4	3	1	1
1	3	3	1	1	1
1	2	4	2	1	0
1	2	4	1	1	0
1	2	4	4	1	1
1	3	2	3	1	1
1	2	4	2	1	1
1	2	1	2	0	0
1	3	4	2	0	0
1	3	4	2	0	1
1	2	4	1	1	0
1	2	4	2	1	0
1	3	4	2	1	0
1	2	1	1	0	0
1	3	2	4	1	1
1	3	2	3	1	1
1	3	4	2	1	0
1	2	3	2	0	0
1	3	4	2	1	1
1	2	4	2	1	0
1	2	4	2	0	0
1	3	2	3	1	1
1	1	1	1	0	1
1	3	4	2	0	0
1	2	4	2	1	1
1	3	2	3	1	1
1	2	4	3	1	1
1	2	4	2	0	0
1	3	3	1	0	1
2	3	3	3	1	0
1	3	3	3	1	0
1	2	4	1	1	1
1	3	1	2	1	0
1	2	4	2	0	0
1	2	4	3	1	1
1	1	4	1	0	1
2	3	4	2	1	1
1	2	2	4	1	1
2	2	4	1	1	1
1	3	3	4	1	1
1	3	3	2	1	0
1	3	4	4	1	0
2	3	3	2	1	1
1	3	3	4	1	1
1	1	4	1	1	1
1	3	3	3	1	1
1	3	1	4	0	1
1	3			1	1
1	2	4		0	1
1	2	4	3	0	1
1	3	2	4	0	0
1	2	2	3	1	1
1	3	2	4	0	0
1	2	2	3	1	1
1	2	2		1	1
1	3			1	1
1	2	2	3	1	1
1	2	4	4	1	0
1	3	1	3	0	0
1	2	1	2	0	0
1	3	2	3	0	0
1	2	1	3	0	0
1				0	0
1	3	3		0	1
1	1	1		0	0
1	2	2	3	0	0
1	2	2	3	0	0
2	3	2	3	1	0
1	3	3	4	1	1
1	3	2	3	1	1
1	3	2	4	1	1
1	2	1		0	0
1	2	1	2	0	0
1	3	2	3	1	0
1	3	3	2	1	0
1		1	2	0	0
1	3	2	3	1	1
1	3	2	3	1	1
1	2	2	3	1	0
1	2	1	3	0	0
1	2	4	3	0	0
1	3	3	3	1	0
1	2	4	2	0	0
1	2	1	2	0	0
1	2	1	2	0	0
1	2	1	2	0	0
1	1	1	3	0	0
1	2	1	2	0	0
1	1	4	4	0	0
1	3	2	3	1	1
1	2	1	3	0	0
1	2	1	2	0	0
1	2	1	2	0	0
1	2	2	2	0	0
1	2	2	2	0	0
1	2	2	2	1	0
2	3	3	3	1	0
1	3	1	2	1	1
1	1	2	2	0	0
1	2	1	3	0	0
1	2	1	3	0	0
1	1	1	4	1	0
1	2	4	4	1	0
1	3	3	4	1	1
1	3	3	4	1	1
1	2	1	3	1	0
2	3	2	4	1	0
1	1	1	3	0	0
1	2	1		0	0
1	3	3	4	1	0
1	2	1	3	0	0
1	2	1	3	0	0
1	2	1	3	0	0
1	2	1	3	0	0
1	2	1	2	0	0
1	3	2	4	1	0
1	2	1	2	0	0
1	2	1	4	0	0
1	2	2	3	0	0
1	2	1	2	1	1
1	3	4	2	1	1
1	3	3	3	1	1
1	3	1	3	0	0
1	1	1	1	1	1
1	2	1	1	1	0
1	3	3	2	1	1
1	2	1	3	1	1
1	2	1	2	0	1
2	1	1	2	0	1
1	2	1	3	0	0
1	1	1	2	0	0
1	3	3	4	1	1
1	2	2	2	0	0

## Sheet: Fig 3
2.5	2.6	2.8	2.9	2.11	2.12	2.13
1	3				1	1
1	2				1	1
1	2	1	1	4	1	1
1	2	3	1	4	1	1
1	2	3	1	3	1	1
3	2	3	1	3	2	1
1	2	3	1		1	1
1	2	3	1		1	1
1	2	3	1	3	1	1
1	2	3	1	3	1	1
2	3	3	1	3	1	1
1	2	3	1	2	1	1
1	2	5	1	3	1	1
1	2	4	3	1	1	1
6	2	4	1	4	1	1
2	2	3	1	3	1	1
1	2	3	1	2	1	1
1	2	3	1	2	1	1
1	2	3	1	2	1	1
1	2	3	1	3	2	1
1	2	3	1	2	1	1
1	2	3	1	3	1	1
1	2	2	1	3	1	1
1	2	3	1	2	1	1
1	2	3	1	2	1	1
1	3	4	1	2	1	1
1	3	4	1	2	1	1
1	2	4	1	2	1	1
2	3	2	1	2	1	1
1	2	4	1	4	1	1
4	3	4	1	4	1	1
1	2	4	1	4	1	1
1	3	4	1	4	1	1
1	2	4	1	4	1	1
2	3	3	1	4	1	1
1	2	2	1	4	1	1
2	3	4	1	4	1	1
2	3	4	1	4	1	1
1	2	4	1	4	1	1
1	2	4	1	2	1	1
2	2	2	1	4	1	1
2	3	1	1	4	1	1
1	3	4	1	4	1	1
1	2	4	1	4	1	1
2	2	4	1	4	1	1
1	2	3	1	4	1	1
4	3	2	1	4	1	1
1	3	3	1	4	1	1
1	2	4	1	4	1	1
1	3	4	1	4	1	1
2	3	4	1	4	1	1
1	2	4	1	4	1	1
2	2	4	1	4	1	1
1	3	4	1	3	1	1
1	3	4	1	4	1	1
5	3	4	1	4	1	1
4	3	4	1	4	1	1
4	3	4	1	4	1	1
4	3	4	1	4	1	1
1	3	4	1	4	1	1
1	3	3	1	4	1	1
2	3	4	1	4	1	1
1	3	4	1	3	1	1
1	3	4	1	3	1	1
2	3	4	1	4	1	1
2	3	4	1	4	1	1
4	3	4	1	4	1	1
2	3	3		4	1	1
4	3	3	1	4	1	1
2	3	3	1	4	1	1
4	3	3	1	4	1	1
1	2	4	1	4	1	1
1	3	4	1	4	1	1
1	3	1	1	2	1	1
4	2	4	1	2	1	1
4	3	4	1	2	1	1
1	3		1		1	1
1	3				2	1
1	3				1	1
1	3				1	1
1	3	1	1		1	1
1	3		1	3	1	1
3	1				2	1
1	4		1	1	2	1
1	3	3	1	1	1	1
1	4	3	1	1	1	1
	1	2	1	2	1	1
1	3	2	1	1	1	1
1	3	3	1	4	1	1
1	4	2	1	3	1	1
1	6	2	1	2	1	1
1	5	1	1	1	1	1
1	4	3	1	1	1	1
1	4	3	1	1	1	1
1	4	3	1	1	1	1
1	3	3	1	2	1	1
1	2	1	1	1	1	1
1	3	3	1	1	1	1
1	4	3	1	1	1	1
1	4	3	1	1	1	1
5	5	3	1	1	1	1
5	6	3	1	1	2	1
1	6	3	1	1	2	1
1	6	3	1	1	2	1
3	1	3	1	1	2	1
5	6	3	1	1	1	1
1	4	3	1	1	1	1
2	1	3	1	1	2	1
1	3	1		1	2	1
1	3	3	1	1	1	1
1	6	2	1	2	1	1
1	1	3	1	1	2	1
1	1	3	1	1	2	1
1	4	3	1	1	1	1
1	4	3	1	1	1	1
1	4	1	1	1	1	1
2	4	3	1	1	1	1
1	2	4	1	1	2	2
1	4	3	1	3	1	1
1	4	3	1	3	2	1
1	1	3	1	1	1	1
1	4	3	1	1	2	1
2	1	1	1	1	2	1
1	5	3	1	1	1	1
1	3	2	1	2	1	1
1	3	2	1	1	1	1
2	3	3	1	3	1	1
1	5	3	1	1	2	1
1	4	3	1	1	2	1
1	4	3	1	3	1	1
5	3	1	1	2	1	1
1	4	3	1	3	1	1
2	5	3	1	1	2	1
1	3	3	1	1	1	1
1	1	2	1	1	2	1
1	5	1	1	2	1	1
2	4	3	1	1	1	2
2	4	3	1	1	1	2
2	3	3	1	1	1	1
1	3	2	1	1	1	1
1	3	2	1	2	1	1
1	3	3	1	3	1	1
1	4	2	1	1	2	2
2	5	3	1	1	1	1
1	4	2	1	1	2	2
3	5	3	1	1	2	1
1	5	1	1	3	2	1
3	2	3	1	1	2	2
1	5	3	1	1	2	2
2	4	4	1	1	1	1
2	4	3	1		1	1
1	4	3	1	1	1	1
1	2	3	1	3	1	2
1	4	3	1	3	1	2
1	6	3	1	3	1	1
1	3	2	1		1	1
1	3	1	1	4	1	1
1	4	2	1	2	2	2
1	4	3	1	3	2	2
2	4	3	1	1	1	1
3	4	3	1	1	2	2
1	2	3	1	2	1	1
1	2	3	1	2	1	1
1	2	3	1	2	1	1
1	2	4	1	2	1	1
1	2	1	1	4	1	1
1	4	4	1	4	1	1
1	2	3	1	4	1	1
1	2	3	1	2	1	1
2	2	4	1	2	1	1
1	3	3	1	2	1	1
1	2	2	1	2	2	1
1	2	2	1	3	1	1
4	3	2	1	1	2	1
4	3	2	1	2	2	2
4	3	1	1	2	1	1
4	3	2	1	3	1	1
5	3	3	1	2	1	1
5	3	2	1	1	1	1
5	2	1	1	2	1	1
5	3	3	1	2	1	1
5	3	2	1	2	1	1
5	3	2	1	2	1	1
5	6	2	1	2	1	1
2	2	2	1	1	2	1
5	3	2	1	2	1	1
5	6	2	1	2	2	1
5	2	2	1	1	2	1
8	3	2	1	2	2	1
5	1	2	1	1	2	1
5	6	2	1	2	2	2
5	3	2	1	1	2	1
5	3	2	1	3	1	1
5	3	2	1	3	1	1
5	2	2	1	2	1	1
5	6	1	1	2	2	1
5	3	2	1	2	2	1
5	3	2	1	1	2	1
5	3	2	1	3	1	1
5	3	2	1	2	1	1
5	1	4	3	3	2	2
5	3	2	1	2	1	1
1	2	4	1	2	1	1
2	3	2	1	3	2	1
5	3	2	1	2	2	1
2	3	2	1	2	1	1
2	3	2	1	3	1	2
3	1	1		1	2	2
5	3	4	1	1	2	1
5	3	2	1	2	2	1
5	3	4	1	1	2	2
5	3	4	3	2	2	2
5	3	2	1	1	2	2
5	3	3	1	1	2	1
5	3	2	1	3	1	1
4	3	2	1	2	2	2
4	5	4	1	2	2	1
5	3	2	1	2	2	1
5	2	4	1	1	2	2
2	6	2	1	1	2	2
2	3	2	1	2	1	1
5	6	2	1	2	1	1
5	3	2	1	2	1	1
2	3	2	1	2	2	1
6	3	4	3	1	2	2
5	3	4	1	1	2	2
2	6	2	1	2	2	2
5	3	4	1	2	2	2
1	2	2	1	3	1	1
5	3	2	1	3	1	1
2	3	4	1	1	1	1
5	2	4	1	3	1	1
5	3	4	1	1	2	2
5	3	2	1	3	1	1
5	4	2	1	1	1	1
1	3	4	1	2	2	2
5	3	4	2	2	2	2
4	6	4	2	2	2	2
4	6	4	1	1	2	2
5	3	2	1	2	2	2
5	2	4	1	2	1	1
5	3	3	1	1	2	2
4	3	2	1	2	2	2
5	3	1	2	2	2	2
2	2	1	3	1	1	1
1	2	3	2	2	2	2
2	5	1	1	1	1	1
	5	1	2	1	2	2
1	3	1	3	3	1	1
2	2	2	1	1	1	1
2	2	2	1	1	1	1
1	2	1	1	1	1	1
4	3	2	1	2	2	2
5	3	4	1	2	2	2
5	3	2	3	1	2	2
4	3	4	3	2	2	2
1	4	1	3	3	2	2
5	3	2	3	2	2	2

## Sheet: Fig 4
2.3
1
1
1
1
1
1
2
1
1
6
2
1
4
5
1
2
6
5
5
1
2
2
1
2
2
5
5
5
1
2
5
5
2
5
1
5
5
1
5
5
1
5
5
1
1
5
1
5
1
1
5
5
2
5
1
1
2
2
2
5
1
1
5
5
5
5
1
5
5
1
1
5
1
5
1
5
4
1
1
1
1
1
1
1
1
3
4
1
5
2
5
5
6
4
3
3
5
5
2
5
2
5
4
3
1
4
4
5
5
1
3
1
5
1
2
1
2
2
1
2
5
1
5
1
1
1
4
4
5
1
1
1
4
1
5
1
6
2
1
5
2
1
2
5
4
1
1
2
1
3
4
5
1
1
5
4
5
5
1
2
1
1
5
5
1
2
2
6
2
6
5
2
5
3
2
4
5
2
4
5
1
5
5
1
2
4
5
2
4
1
4
5
1
4
5
1
1
4
5
1
5
4
1
2
4
5
5
1
1
5
4
5
1
2
3
1
5
2
2
4
5
1
5
5
1
4
4
5
4
5
5
1
1
1
4
4
5
5
4
1
4
1
5
1
1
1
1
1
1
1
1
1
2
2
5
5
4
1
1
1
1
1
4
5
4
1
2
4
1
1
2
5
5
5
1
1
1
4
2
2
5
1
1
1
1
1
1
1
1

## Sheet: Fig 5
2.7
1
2
2
1
1
1
5
1
3
1
3
1
1
5
1
3
1
3
5
1
3
1
1
3
1
5
3
3
3
1
3
1
1
1
5
5
5
3
3
1
1
1
1
5
5
5
4
5
5
5
5
3
3
5
5
5
5
5
5
1
3
1
5
3
3
5
5
5
5
5
5
3
3
3
3
1
5
3
1
1
1
1
1
3
1
1
1
1
1
1
1
1
1
1
1
1
1
1
1
1
1
4
1
3
3
3
3
5
3
1
2
5
1
1
1
1
3
2
1
1
1
1
1
1
1
1
1
1
1
4
3
1
3
4
1
3
1
1
1
1
1
2
1
1
3
1
1
3
2
1
1
2
1
3
1
2
1
4
2
4
4
3
3
5
5
1
1
1
5
3
5
3
5
1
1
1
1
5
1
2
4
1
5
4
5
5
5
5
5
5
5
5
4
5
1
5
4
2
5
4
3
4
5
5
1
4
5
4
1
2
1
3
4
4
3
4
3
5
5
1
4
5
5
4
1
4
4
5
4
3
5
5
4
4
6
5
1
4
4
3
4
4
3
3
3
3
5
3
1
3
5
4
4
4
5
4
3
6
2
6
1
3
6
1
5
1
5
5
3
3
5
4
5
1
3
1
1
1
3
5
5
5
1
1
1
1
5
5
5
3
5
1
1
1
1
5
3
1
1
1
1
1
1
1
1
1
1
1
1
3
1
3
1
1
1
1
1
1
1
1
1
1
1
1
1
1
5
2
5
4
1
1
3
5
5
2
1
1
1
1
1
5
1
3
4
5
1
4
1
4
4
5
1
4
1
5
4
1
1
3
5
1
4
4
5
1
3
4
1
3
4
4
5
4
5
3
5
4
4
5
4
3
1
4
4
5
1
4
5
1
5
3
4
5
1
5
2
5
3
5
5
5
5
5
5
5
5
5
4
1
3
6
3
4
5
2
5
3
5
4
3
3
3
5
4
3
4
1
4
1
3
1
5

## Sheet: Fig 6
2.1
2
3
1
7
1
7
1
6
1
7
8
7
3
1
7
1
1
1
1
6
6
2
2
6
1
1
5
5
1
2
1
6
3
3
1
1
3
5
2
1
6
5
1
1
1
3
2
2
1
6
2
1
1
7
1
2
2
1
1
7
3
2
2
1
2
5
5
6
3
2
7
2
7
1
1
6
2
6
2
1
2
3
1
2
6
5
3
2
2
3
2
6
3
1
6
2
2
1
5
3
2
7
1
6
2
3
6
3
2
1
5
1
5
5
6
2
5

## Sheet: Fig 7
ID	P16	LBC	P16/Ki-67
X-01	+	LSIL	-
X-02	-	NILM	-
X-03	-	NILM	-
X-04	+	LSIL	-
X-05	-	NILM	-
X-06	-	NILM	-
X-07	-	NILM	-
X-08	-	NILM	-
X-09	-	NILM	-
X-10	-	NILM	-
X-11	-	NILM	-
X-12	-	NILM	-
X-13	-	NILM	-
X-14	-	NILM	-
X-15	-	NILM	-
X-16	-	NILM	-
X-17	-	NILM	-
X-18	-	NILM	-
X-19	-	NILM	-
X-20	-	NILM	-
X-21	-	NILM	-
X-22	-	NILM	-
X-23	-	NILM	-
X-24	-	NILM	-
X-25	-	NILM	-
X-26	-	NILM	-
X-27	-	NILM	-
X-28	-	NILM	-
X-29	-	NILM	-
X-30	-	NILM	-
X-31	-	NILM	-
X-32	-	NILM	-
X-33	-	NILM	-
X-34	-	NILM	-
X-35	-	NILM	-
X-36	-	NILM	-
X-37	-	NILM	-
X-38	-	NILM	-
X-39	-	NILM	-
X-40	-	NILM	-
X-41	-	NILM	-
X-42	-	NILM	-
X-43	-	NILM	-
X-44	-	NILM	-
X-45	-	NILM	-
X-46	-	NILM	-
X-47	-	NILM	-
X-48	-	NILM	-
X-49	-	NILM	-
X-50	-	NILM	-
X-51	-	NILM	-
X-52	-	NILM	-
X-53	-	NILM	-
X-54	-	NILM	-
X-55	-	NILM	-
X-56	-	NILM	-
X-57	-	NILM	-
X-58	-	NILM	-
X-59	+	LSIL	-
X-60	-	NILM	-
X-61	-	NILM	-
X-62	-	NILM	-
X-63	-	NILM	-
X-64	-	NILM	-
X-65	-	NILM	-
X-66	-	NILM	-
X-67	-	NILM	-
X-68	-	NILM	-
X-69	-	NILM	-
X-70	-	NILM	-
X-71	-	NILM	-
X-72	+	ASC-H	-
X-73	-	NILM	-
X-74	-	NILM	-
X-75	-	NILM	-
X-76	-	NILM	-
X-77	-	NILM	-
X-78	-	NILM	-
X-79	-	NILM	-
X-80	-	NILM	-
X-81	-	NILM	-
X-82	-	NILM	-
X-83	-	NILM	-
X-84	-	NILM	-
X-85	-	NILM	-
F-01	-	NILM	-
F-02	-	NILM	-
F-03	-	NILM	-
F-04	-	NILM	-
F-05	-	NILM	-
F-06	-	NILM	-
F-07	-	NILM	-
F-08	-	NILM	-
F-09	-	NILM	-
F-10	-	NILM	-
F-11	-	NILM	-
F-12	-	NILM	-
F-13	-	NILM	-
F-14	-	NILM	-
F-15	-	NILM	-
F-16	-	NILM	-
F-17	-	NILM	-
F-18	-	NILM	-
F-19	-	NILM	-
F-20	-	NILM	-
F-21	-	NILM	-
F-22	-	NILM	-
F-23	-	NILM	-
F-24	-	NILM	-
F-25	-	NILM	-
F-26	-	NILM	-
F-27	-	NILM	-
F-28	-	NILM	-
F-29	-	NILM	-
F-30	+	LSIL	-
F-31	-	NILM	-
F-32	-	NILM	-
F-33	-	NILM	-
F-34	-	NILM	-
F-35	-	NILM	-
F-36	-	NILM	-
F-37	-	NILM	-
F-38	-	NILM	-
F-39	-	NILM	-
F-40	-	NILM	-
F-41	-	NILM	-
F-42	-	NILM	-
F-43	-	NILM	-
F-44	-	NILM	-
F-45	-	NILM	-
F-46	-	NILM	-
F-47	-	NILM	-
F-48	-	NILM	-
F-49	-	NILM	-
F-50	-	NILM	-
F-51	-	NILM	-
F-52	-	NILM	-
F-53	+	LSIL	-
F-54	-	NILM	-
F-55	-	NILM	-
F-56	+	LSIL	-
F-57	-	NILM	-
F-58	-	NILM	-
F-59	-	NILM	-
F-60	-	NILM	-
F-61	-	NILM	-
F-62	-	NILM	-
F-63	-	NILM	-
F-64	-	NILM	-
F-65	-	NILM	-
F-66	-	NILM	-
F-67	-	NILM	-
F-68	-	NILM	-
F-69	-	NILM	-
F-70	-	NILM	-
F-71	-	NILM	-
F-72	-	NILM	-
F-73	+	LSIL	-
F-74	-	NILM	-
F-75	-	NILM	-
F-76	-	NILM	-
F-77	-	NILM	-
F-78	-	NILM	-
F-79	-	LSIL	-
F-80	+	LSIL	-
F-81	-	NILM	-
F-82	-	NILM	-
F-83	-	NILM	-
F-84	-	NILM	-
F-85	-	NILM	-
F-86	-	LSIL	-
F-87	-	NILM	-
F-88	/	/	-
F-89	-	NILM	-
F-90	/	/	-
F-91	-	NILM	-
F-92	-	NILM	-
F-93	-	NILM	-
F-94	-	NILM	-
F-95	+	LSIL	-
Z01	+	LSIL	-
Z35	-	NILM	-
Z45	-	NILM	-
1	-	NILM	-
2	-	NILM	-
3	-	NILM	-
4	-	NILM	-
5	-	NILM	-
6	-	NILM	-
7	-	NILM	-
8	-	NILM	-
9	-	NILM	-
10	-	NILM	-
11	-	LSIL	-
12	-	NILM	-
13	-	NILM	-
14	-	NILM	-
15	-	NILM	-
16	-	NILM	-
17	+	HSIL	+
18	-	NILM	-
19	-	NILM	-
20	-	NILM	-
21	+	LSIL	-
22	+	ASC-H	+
23	-	NILM	-
24	-	NILM	-
25	-	NILM	-
26	-	NILM	-
27	-	NILM	-
28	-	NILM	-
29	-	NILM	-
30	/	/	-
31	-	NILM	-
32	-	NILM	-
33	-	NILM	-
34	-	NILM	-
35	-	NILM	-
36	-	NILM	-
37	-	NILM	-
38	-	NILM	-
39	-	NILM	-
40	+	LSIL	-
41	-	NILM	-
42	-	NILM	-
43	-	NILM	-
44	-	NILM	-
45	-	NILM	-
46	-	NILM	-
47	-	NILM	-
48	-	NILM	-
49	-	NILM	-
50	-	NILM	-
51	-	NILM	-
52	-	NILM	-
53	-	LSIL	-
54	-	LSIL	-
55	-	NILM	-
56	-	NILM	-
57	-	NILM	-
58	-	NILM	-
59	-	NILM	-
60	-	NILM	-
61	-	NILM	-
62	-	NILM	-
63	-	NILM	-
64	-	NILM	-
65	-	NILM	-
66	-	NILM	-
67	-	NILM	-
68	-	NILM	-
69	-	NILM	-
70	-	NILM	-
71	-	NILM	-
72	-	NILM	-
73	+	LSIL	-
74	-	NILM	-
75	-	NILM	-
76	-	NILM	-
77	-	NILM	-
