# Supplementary material for: Barriers to cervical cancer prevention and triage strategies: a study of knowledge, attitudes, and p16/Ki-67 dual-staining utility among high-risk women in Tuoli and Fuyun counties, Xinjiang
Source: PeerJ. 2025 Oct 2;13:e20100. doi: 10.7717/peerj.20100 (PMC12497396; doi:10.7717/peerj.20100)
Supplement: Supplemental Information 47 [file peerj-13-20100-s047.doc]

# Cervical Cancer Screening Questionnaire

Instructions for completing the form: Please tick the "£" before the options, which are all single choice, except for those marked "multiple choice".

Part I: Basic Information

**1.1 ID: __________**

**1.2 Ethnicity:**

£ 1 = Han

£ 2 = Mong

£ 3 = Other

**1.3 Marital status:**

£ 1 = Unmarried

£ 2 = Married

£ 3 = Divorced

£ 4 = Widowed

£ 5 = Other, please specify: __________

**1.4 Educational attainment**

£ 1 = uneducated

£ 2 = Primary

£ 3 = Junior High School

£ 4 = High school (including secondary and technical schools)

£ 5 = Bachelor's degree and above (including tertiary)

**1.5 Employment status**

£ 1 = no work

£ 2 = Farmers

£ 3 = Military

£ 3 = parent organization, required to attend Population

£4 = Enterprises, business, service workers

£ 5 = State organs, party organizations and institutions

£ 6 = Workers

£ 7 = Other, please specify: __________

**1.6 Your total family income last year (RMB):**

£ 1 = less than 30,000

£ 2 = 30-60,000 (excluding 60,000)

£ 3 = 60,000-100,000 (excluding 100,000)

£ 4 = 100,000 or more (inclusive)

**1.7 How do you pay for your health care: (multiple choice)**

£ 1 = urban workers' health insurance

£ 2 = urban residents' health insurance

£ 3 = New Rural Co-operative Medical Care

£ 4 = Commercial medical insurance

£ 5 = Poverty assistance

£ 6 = fully self-funded

£ 7 = Other, please specify: __________

Part II: Awareness and acceptance of cervical cancer screening

**2.1 Have you heard of human papillomavirus (HPV)?**

£ 1 = Yes

£2=No

**2.2 Have you heard of cervical cancer screening?**

£ 1 = Yes

£ 2 = No (skip to 2.5)

**2.3 Where did you get information about cervical cancer screening? (Multiple choice)**

£ 1 = village doctor or higher level (hospital) notification

£ 2 = family/friend referral

£ 3 = Slogans and posters

£ 4 = Social welfare campaigns

£ 5 = Media (radio/television/newspapers/magazines/web)

£ 6 = Other, please specify: __________

**2.4 What are some of the cervical cancer screening methods you have heard of? (Multiple answers allowed)**

£ 1 = Don't know

£ 2 = cytological examination (Pap smear, liquid-based cytology)

£ 3 = Visual inspection with acetic acid/iodine solution (VIA/VILI)

£ 4 = HPV detection (e.g., HC2, careHPV, Cobas4800)

£ 5 = Colposcopy

£ 6 = Other, please specify: __________

**2.5** **How often would you be willing to be screened for cervical cancer?**

£ 1 = once per year

£ 2 = every three years

£ 3 = every five years

£ 4 = based on screening results

£ 5 = follow medical advice

£ 6 = unwilling

£ 7 = Other, please specify: __________

**2.6 What is the longest acceptable time to get your results reported?**

£ 1 = Don't know

£ 2 = 1 day

£ 3 = within one week

£ 4 = within half a month

£ 5 = In one month

£ 6 = both, at doctor's discretion

£ 7 = Other, please specify: __________

**2.7** **What do you think would make it possible for people who do not want to take part in screening to do so (multiple choice):**

£ 1 = More hygiene promotion and education

£ 2 = Take your own cervical sample

£ 3 = parent organization, required to attend

£ 4 = Reduce the number of inspections and solve traffic problems

£ 5 = Persuasion by family or friends

£ 6 = Other, please specify: __________

**2.8 How would you like to have feedback on the results of this screening?**

£ 1 = mobile phone SMS

£ 2 = telephone call

£ 3 = report card

£ 4 = Ask the doctor yourself

£ 5 = Other, please specify: __________

**2.9 Would you be willing to have a second test if your doctor called?**

£ 1 = willing (skip 2.11)

£ 2 = unwilling

£ 3 = Uncertain (skip 2.11)

**2.10 What keeps you from having a second test? (Multiple choice)**

£ 1 = Too frequent inspections

£ 2 = Long way to go, too much hassle

£ 3 = Screening too hard to go through again

£ 5 = Feeling healthy/results not serious enough to warrant a review

£ 6 = Prefer to be re- tested at county and city hospitals

£ 7 = Too busy to have time

£ 8 = Other, please specify: __________

**2.11** **Circumstances in which you may not wish to have treatment:**

£ 1 = Lack of money for treatment

£ 2 =asymptomatic, no treatment required

£ 3 = no time

£ 4 = Other, please specify: __________

**2.12 Have you heard about the HPV/cervical cancer vaccine?**

£ 1 = Yes

£2=No

**2.13 Would you like your child to be vaccinated against HPV?**

£ 1 = Yes

£2=No
